# Supplementary material
Source: PubMed Central journal article supplement (PMC7965622)
Supplement: 3483_figures.pdf [file 3483_figures.pdf]

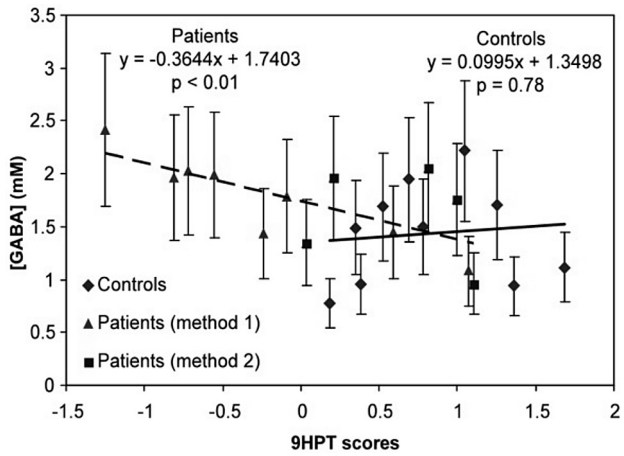

**ON-LINE FIG 1.** Plots of sensorimotor  $\gamma$ -aminobutyric acid concentration versus Nine-Hole Peg Test scores in healthy controls and patients with multiple sclerosis. A fixed error bar of 30% is used for [GABA] in the plot. Methods 1 and 2 correspond to acquisitions using interleaved navigator and weak water suppression, respectively.

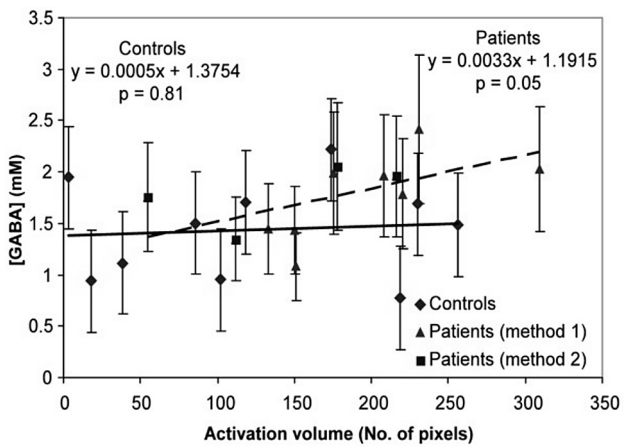

**ON-LINE FIG 2.** Plots of sensorimotor  $\gamma$ -aminobutyric acid concentration versus fMRI activation volume in healthy controls and patients with multiple sclerosis. A fixed error bar of 30% is used for [GABA] in the plot. Methods 1 and 2 correspond to acquisitions using interleaved navigator and weak water suppression, respectively.
